# Supplementary material
Source: publisher figshare collection journal article supplement (https://sage.figshare.com/ndownloader/files/40903461)

Supplementary Figure S1. Epidemical and pathological time courses in other clustered groups of patients ( $n = 235$ ) with confirmed COVID-19 infection that were included in a study of the transmission patterns and epidemiological time courses in Shenzhen, China.

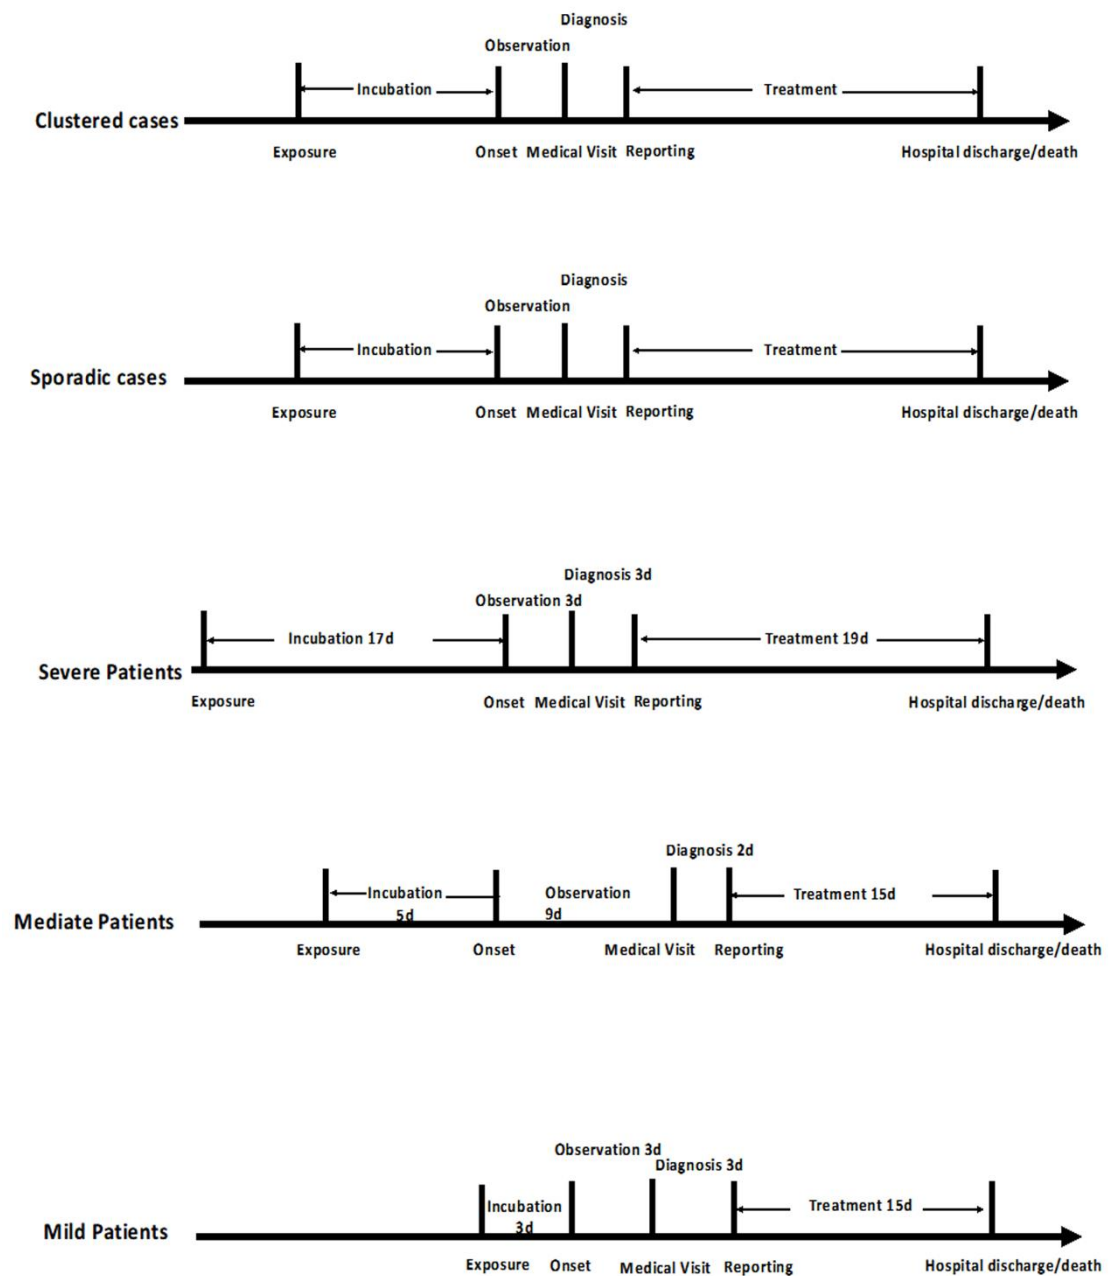

Supplement: Supplementary file 1 [file 40903461]
